# Supplementary material
Source: Springer Nature journal article supplement (https://www.springermedizin.de/resource/supplementary/13020_2006_3_MOESM2_ESM.pdf/9640790)

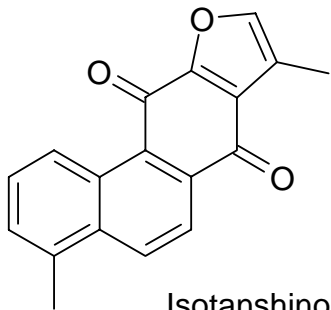

Isotanshinone I

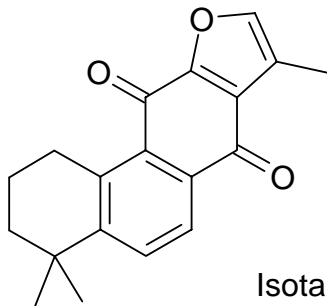

Isotanshinone II

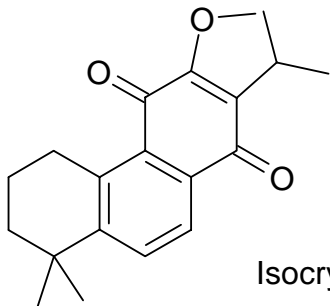

Isocryptotanshinone

Supplement: MOESM2 [file 9640790]
